## Title Page

Genome-wide association links candidate genes to fruit firmness, fruit flesh color, flowering time, and soluble solid content in apricot (*Prunus armeniaca*)

Filiz Ferik: Ege University, Engineering Faculty, Department of Bioengineering, 35040 Bornova Izmir Turkey

Duygu Ates: Ege University, Engineering Faculty, Department of Bioengineering, 35040 Bornova Izmir Turkey,

Sezai Ercisli: Ataturk University, Agriculture Faculty, Department of Horticulture, 25030 Yakutiye/ErzurumTurkey,

Abdullah Erdogan: Institute for Apricot Research of Malatya, 44090 Malatya, Turkey

Emine Orhan: Ataturk University, Agriculture Faculty, Department of Horticulture, 25030 Yakutiye/ErzurumTurkey

Corresponding author: Muhammed Bahattin Tanyolac: Ege University, Engineering Faculty, Department of Bioengineering, 35040 Bornova Izmir Turkey. ORCID: 0000-0002-4368-0988

E-mail address: [bahattin.tanyolac@ege.edu.tr](mailto:bahattin.tanyolac@ege.edu.tr)

Phone: +90 232 3115815

This work is a part of Master of Science Thesis of Filiz Ferik who is the first author of the manuscript.

1  
2 Genome-wide association links candidate genes to fruit firmness, fruit flesh color, flowering  
3 time, and soluble solid content in apricot (*Prunus armeniaca*)

4 Filiz Ferik, Duygu Ates, Sezai Ercisli, Abdullah Erdogan, Emine Orhan, Muhammed Bahattin  
5 Tanyolac\*

6 **Abstract:**

7 Apricots originated from China, Central Asia and the Near East and arrived in Anatolia, and  
8 particularly in their second homeland of Malatya province in Turkey. Apricots are outstanding  
9 summer fruits, with their beautiful attractive colour, delicious sweet taste, aroma and high  
10 vitamin and mineral content. In the current study, a total of 259 apricot genotypes from different  
11 geographical origins in Turkey were used. Significant variations were detected in fruit firmness  
12 (FF), fruit flesh color (FFC), flowering time (FT), and soluble solid content (SSC). A total of  
13 11,532 SNPs based on DArT were developed and used in the analyses of population structure  
14 and association mapping (AM). According to the STRUCTURE (v.2.2) analysis, the apricot  
15 genotypes were divided into three groups. The mixed linear model with Q and K matrixes were  
16 used to detect the associations between the SNPs and four traits. A total of 131 SNPs were  
17 associated with FF, FFC, and SSC. The results demonstrated that AM had high potential of  
18 revealing the markers associated with economically important traits in apricot.

19 **Keywords:** association mapping, apricot, fruit firmness, fruit flesh color, flowering time,  
20 soluble solid content

21 **Introduction**

22  
23 Rosaceae is one of the most important fruit tree family from temperate regions,  
24 including apple, peach, strawberry, plum, almond, pear, European plum, and sweet cherry  
25 which are economically important fruit species (1)(2)(3). Apricot, *Prunus armeniaca* (Lam.),  
26 is also a member of this family and an important stone fruit with a total world production of  
27 about 3.8 million tons (4). The major apricot producing countries are Turkey (730.000 tons),  
28 Uzbekistan (662.123 tons), and Iran (306.115 tons) in the world (4).

29 Various parameters affect fruit quality in apricot (5)(6)(7). Consumer preferences are  
30 based on fruit quality which refers to sensorial properties, such as appearance, texture, taste and

31 aroma, high nutritional components, chemical components, functional properties, and  
32 mechanical characteristics (8). The appearance of fruit is the main criterion for consumers,  
33 while a low level of sweetness and hard texture are undesired (9). Thus, fruit firmness and fruit  
34 flesh color are important for consumer satisfaction (10).

35 Another important parameter affecting fruit quality is soluble solid content (SSC),  
36 which includes sugars, organic acids, proteins, minerals, lipids, amino acids, and vitamins, and  
37 it is the main criteria that determines the taste, flavor and nutritional value of the fruit (11). In  
38 addition to being a delicious edible product, the fruit of apricot is also considered as functional  
39 due to its chemical ingredients (12)(13)(14)(15). The apricot fruit makes a significant  
40 contribution to human health through its phenolic compounds content with immune-  
41 stimulating, anti-inflammatory and antioxidants properties (16)(15).

42 One of the important traits for apricot producers is flowering time, which is a substantial  
43 agronomic trait with an impact on fruit and seed growth in temperate fruit tree species. In cold  
44 regions, early flowering individuals are damaged by late frost, while in warm regions, late  
45 flowering individuals could lead to some problems concerning leaf and flower bud break,  
46 resulting in a decrease in the amount of harvest (17). In addition, early flowering species have  
47 economic value in terms of early market prices.

48 Complex traits including most of the fruit quality properties are controlled by interacting  
49 genes called quantitative traits (18)(1). Therefore, the clarification of transmission of complex  
50 traits is one of the main topic for agricultural sciences (19). Quantitative trait locus (QTL)  
51 mapping is a prevalent method for the mapping of these kinds of traits and bases on biparental  
52 mapping populations (20). Constructing a new cross population is a tedious, time consuming  
53 and expensive process (21). Considering the long generation and juvenile period of fruit trees,  
54 it is more difficult to apply QTL mapping (19)(1). To date, a certain number of QTL maps have  
55 been constructed for apricot, such as flowering time (22)(23), resistance to sharka disease  
56 (24)(10)(25)(26), fruit quality traits (27)(28), chilling requirements (29), and tree architectural  
57 traits (28).

58 AM is an alternative method to pedigree-based QTL mapping (30) and uses natural  
59 populations, contrary to QTL mapping, to determine the correlations between phenotypes and  
60 genotypes (31). AM also utilizes historical recombination and natural variation as a basis and  
61 provides high map resolution in shorter time due to no requirement of developing a new cross  
62 population (30). This method has been previously employed for different fruit trees, such as  
63 peach (32)(33)(34)(35)(30), apple (36), almond (30), and apricot (29)(37).

64 The objective of this study was to investigate the associations between SNPs based on  
65 the diversity arrays technology (DArT) and the pomological traits of apricot, namely fruit  
66 firmness (FF), fruit flesh color (FFC), flowering time (FT), and SSC using 259 apricot  
67 genotypes.

68

## 69 **Materials and Methods**

### 70 **Plant Material and DNA Isolation**

71 A total of 259 apricot (*Prunus armeniaca* L.) genotypes, which were grown together at  
72 Malatya Apricot Research Institute in Turkey, were used in this study (S1Table). All genotypes  
73 had been planted (with 3 replications for each genotype) with eight-meter spacing between and  
74 within the rows in the experimental station of Malatya Apricot Research Institute, and all trees  
75 were 20 years old. Standard management practices concerning chemical fertilization, pruning,  
76 and disease control were being applied to the trees.

77 Young leaves were collected from each apricot genotype, cooled in liquid nitrogen, and  
78 stored at -80 °C for future analyses. The leaf samples were ground into small pieces with a  
79 tissue lyser (Technogen Co., Turkey). DNA extraction was carried out with 0.1 g samples of  
80 each individual following the protocol described by Deshmukh et al. (2007) with minor  
81 modifications. Tris-EDTA (TE) buffer (100 µl) was used to dissolve the extracted DNA. For  
82 the purification and quantification assessment of the isolated DNA, 1% agarose gel and a  
83 spectrophotometer (NanoDrop ND 1000) were used, respectively. After confirmation, the DNA  
84 samples were stored at -80 °C until they were used for SNP analyses.

85

### 86 **Pomological Evaluation**

87 Forty fruits from each replication of genotype were randomly selected and harvested  
88 separately for each tree. FFC was measured with a Minolta Chroma Meter CR-400 (Minolta-  
89 Konica, Japan). For FT, observations were made by experts, and the first day of flowering was  
90 noted as FT. The juice of the 40 apricots was measured with a digital refractometer (Model RA-  
91 250HE Kyoto Electronics, Kyoto, Japan), and the SSC values were recorded in °Brix. FF was  
92 measured with an acoustic firmness sensor (Aweta BV, the Netherlands). These fruit traits were  
93 measured for two consecutive years (2016 and 2017).

94

### 95 **Variance Analysis**

96 To define the variations in FF, FFC, FT and SSC among the 259 genotypes over two  
97 years (2016 and 2017), an analysis of variance (ANOVA) was performed using TOTEMSTAT

98 software (39) according to the significance level of  $P \leq 0.01$ . The variations were determined  
99 according to year (Y), genotype (G), and Y x G interactions.

100

### 101 **DArT analysis**

102 The DArT analysis was performed as described by NEMLI et al. (2017). The  
103 polymorphism information content (PIC) values represent the discrimination power of the  
104 markers. The PIC values were calculated for each marker according to Lynch and Ritland  
105 (1999) with the following equation:  $PIC=1-\sum p_i^2$ , where  $p_i$  demonstrates the proportion of the  
106 population with the  $i^{\text{th}}$  allele.

107

### 108 **Genetic Variation Analysis**

109 STRUCTURE software (v.2.3.4), which is based on Bayesian modelling, was used to  
110 determine the population structure of 259 apricot genotypes (42). The software was run with a  
111 burn-in period of 10,000 and 10,000 Markov Chain Monte Carlo (MCMC) replications. Ten  
112 runs were performed for each number of populations (K), ranging from 1 to 10. The best number  
113 of subpopulations was determined with the Delta K ( $\Delta K$ ) value using STRUCTURE  
114 HARVESTER (43). For cross checking, the principle component analysis (PCA) was carried  
115 out with R Software [R statistical functions (R stats) and Gaussian mixture modelling for  
116 model-based clustering, classification, and density Estimation (mclust)], and a dendrogram tree  
117 was drawn with the same software with reference to Nei's genetic distance (44).

118

### 119 **Association Mapping Analysis**

120 TASSEL (v.5.2.3) software with a mixed linear model (MLM (K+Q) model) was used  
121 for the detection of the associations between DNA markers and pomological traits (FF, FFC,  
122 FT, and SSC) (45). The relative kinship matrix, which shows the genetic relationships between  
123 the individuals, was calculated by TASSEL (v.5.0) based on the centered IBS method (45). The  
124 Q matrix was obtained from STRUCTURE software at the  $\Delta K = 3$  value. The associations  
125 between the SNP markers and pomological traits were visualized as Manhattan plots in R  
126 software with the "qqman" package. The designation of significant markers was performed in  
127 the same software with the false discovery rate (FDR) (46) and Bonferroni correction (47) being  
128 calculated separately for each pomological trait (FF, FFC, FT and SSC). Furthermore, the  
129 quantile-quantile (Q-Q) plots were visualized with the same software.

130

131

## 132 Identification of candidate genes

133 The sequences of the SNP markers associated with FF, FFC, and SSC were analyzed to  
134 determine the functions of the candidate genes using the Phytome (v12.1) database.

135

## 136 Results

### 137 Phenotypic Variation

138 In the present study, FF, FFC, FT, and SSC were measured for two years (2016-2017),  
139 and showed normal distribution (S1-4 Fig). These findings indicated the importance of the  
140 genetic background of each genotype for the *Prunus* phenotyping profile. The minimum,  
141 maximum and mean values of each year showed high consistency, and no significant  
142 differences were observed between the years (2016 and 2017) for the mean values. The  
143 minimum, maximum and mean values of all phenotypic traits are presented in S2 Table.

144 The mean values of four traits (FF, FFC, FT and SSC) only slightly differed between  
145 the two years (2016 and 2017). However, there were fourfold differences between the SSC and  
146 FFC values obtained from 2016 and 2017 (Table 1). FT ranged from 95 to 125 days with a  
147 mean value of 114.2 days in 2016, and it ranged from 95 to 126 days with a mean value of 112  
148 days in 2017 (Table 1). FF varied between 0.1 N and 9.60 N in 2016 and 0.03 N and 6.62 N in  
149 2017 (Table 1). There was a nearly 90-fold difference in the ranges obtained for FF from the  
150 two years. The individuals showing the highest and lowest average values are listed in S2 Table.

151

152 **Table 1** Minimum, maximum and mean values of all phenotypic traits

| Trait | 2016      |            |             | 2017      |            |            |
|-------|-----------|------------|-------------|-----------|------------|------------|
|       | Min       | Max        | Mean        | Min       | Max        | Mean       |
| FF    | 0.1 N     | 9.60 N     | 1.86 N      | 0.03 N    | 6.62 N     | 1.71 N     |
| FFC   | 11.6°     | 46.72°     | 34.04°      | 13.99°    | 46.77°     | 34.12°     |
| FT    | 95 days   | 125 days   | 114.24 days | 95 days   | 126 days   | 112 days   |
| SSC   | 8.22°Brix | 29.92°Brix | 15.28°Brix  | 8.23°Brix | 32.37°Brix | 16.27°Brix |

153

154

155 The results of the correlation analysis showed no significant correlation between the  
156 four traits (FF, FFC, FT and SSC) (S3 Table). The results of ANOVA are presented in S4  
157 Table. ANOVA demonstrated significant variations according to year, genotype, and year x  
158 genotype interactions for all apricot traits at the  $P \leq 0.01$  significance level (S4 Table).

159

## 160 **Population Structure Analysis**

161 A total of 24,864 SNP markers were generated from the DArT analysis, and after  
162 filtering the missing data (max 5% missing data, Marker Allele Frequency (MAF)>0.5), 11,532  
163 high-quality SNP markers were obtained. The PIC value was 0.77, ranging between 0.05 and  
164 0.99. These markers were assigned to the related scaffolds and were used in the STRUCTURE  
165 (v.2.2) analysis. This analysis was performed for K from 1 to 10, and the peak was observed at  
166 K = 3 according to the  $\Delta K$  computation data. The STRUCTURE results showed that the 259  
167 genotypes were divided into three main populations: namely POPI (red), POPII (green) and  
168 POPIII (blue) (S5 Fig). All these genotypes were also further divided into three groups  
169 according to Nei's genetic distance analysis: The first group consisted of Geno 185 (Nigde -  
170 Turkey) and Geno 186 (Malatya-Turkey), the second comprised Geno 38 (Siverek/Urfa -  
171 Turkey), Geno 230 (USA) and Geno 255 (Russia), and the third contained the remaining 254  
172 genotypes. These results indicate that the genotypes used in this study were not clustered  
173 according to their geographical origin. In addition, PCA revealed three groups for the  
174 population used in this study (S6 Fig), confirming the results obtained from STRUCTURE (S7  
175 Fig) and Nei's genetic distance analyses (S4 Fig).

176 The expected heterozygosity and fixation index ( $F_{st}$ ) are parameters that explain the  
177 heterozygosity level of a population. In this study, the expected heterozygosity was determined  
178 as 0.20 for Cluster 1, 0.06 for Cluster 2, and 0.11 for Cluster 3, with a mean value of 0.12. On  
179 the other hand, the  $F_{st}$  value varied between 0.14 and 0.81 with a mean value of 0.55,  
180 representing a high genetic variation level for the population.

181

## 182 **AM Analysis**

183 AM analyses were carried out for four pomological traits (FF, FFC, FT and SSC) using  
184 TASSEL (v.5.2.3) software and the MLM (Q+K) model in two consecutive years (2016 and  
185 2017). These analyses detected a large number of associations related to the pomological traits.  
186 FDR and Bonferroni corrections were applied to eliminate the false positives among the  
187 associations. Eventually, 131 SNP markers were found to be associated with three traits (FF,  
188 FFC, and SSC). Among these associations, three, 57 and 71 SNPs were associated with FFC,  
189 FF and SSC respectively.

190 A total of 88 and 228 SNPs were associated with FF in 2016 and 2017, respectively  
191 (FDR correction applied,  $-\log_{10}P \geq 2.90$  for 2016 and  $\geq 2.78$  for 2017), and 57 of these markers

192 were common for both 2016 and 2017 (S5 and S6 Tables and Fig 1). Most of the significant  
193 SNPs for FF were detected in 2017 but not in 2016 (S5 and S6 Tables and Fig 1).

194 For FFC, three SNPs ( $-\log_{10} P$  value is  $\geq 3.27$ , FDR correction applied) and 13 SNPs ( $-\log_{10} P \geq 3.10$ , FDR correction applied) were associated with FFC in 2016 and 2017,  
195 respectively, and three of these SNPs (SNP 4257, SNP 17194 and SNP 22875) was common  
196 for both years (S5 Table and Fig 2).

198 The marker-trait association analysis for FT revealed that it was associated with 10  
199 SNPs (FDR correction applied,  $-\log_{10} P \geq 3.28$ ) in 2016 and 22 SNPs (FDR correction applied,  
200  $-\log_{10} P \geq 3.06$ ) in 2017. However, none of these SNPs was commonly seen in both years (S5  
201 Table and Fig 3).

202 For SSC, 167 SNPs ( $-\log_{10} P \geq 2.82$ , FDR correction applied) and 352 SNPs ( $-\log_{10} P \geq$   
203  $2.72$ , FDR correction applied) were found related in 2016 and 2017, respectively. Of these  
204 SNPs, 71 were detected in both years (Fig 4 and S5 and S7 Tables). The  $P$  values presenting  
205 the significance level of the associations between the markers and pomological traits are given  
206 in Q-Q plots in S8 Fig.

207

## 208 **Identification of Candidate Genes**

209 A total number of 30 putative candidate genes were found to be related to the SNPs  
210 associated with FF and SSC (S8 Table). SNPs which were associated with the FFC trait did not  
211 show similarity to any of the putative candidate genes. For the SSC of the apricots, the following  
212 proteins and enzymes related to putative candidate genes showed homology with SNPs (given  
213 in parentheses): putative 3,4-dihydroxy-2-butanone kinase (SNP526), putative leucine-rich  
214 repeat receptor-like protein kinase (SNP1023), pentatricopeptide repeat-containing protein  
215 (SNP1482), probable LRR receptor-like serine/threonine-protein kinase (SNP1494), vignain-  
216 like (SNP2823), transcription termination factor MTERF6 (SNP3309), LRR receptor-like  
217 serine/threonine-protein kinase GSO2 (SNP3842), WAT1-related protein At5g64700  
218 (SNP4443 and SNP20435), cell division cycle 20.2, cofactor of APC complex-like (SNP4948),  
219 long-chain acyl-CoA synthetase8 (SNP5158), calcium-transporting ATPase 12 plasma  
220 membrane-type-like (SNP5444), probable LRR receptor-like serine/threonine-protein kinase  
221 At4g36180 (SNP13398), peroxidase 5 (SNP14227), UDP-glycosyltransferase TURAN  
222 (SNP15803), tRNA (guanine(37)-N1)-methyltransferase 1 (SNP16184), transcription factor  
223 TFIIIB component B" homolog (SNP16422), receptor like protein 30-like (SNP17431),  
224 putative disease resistance protein (SNP19126), putative pre-16S rRNA nuclease (SNP19568),  
225 DNA-directed RNA polymerase III subunit (SNP 20753), DEAD-box ATP-dependent RNA



226 helicase 3 (SNP22678), putative pentatricopeptide repeat-containing protein (SNP23251), S  
227 locus F-box protein f (SLFf) gene, partial cds; and Sf-RNase and S haplotype-specific F-box  
228 protein f (SFBf) genes, complete cds (SNP23325), putative disease resistance RPP13-like  
229 protein 1 (SNP23732), TMV resistance protein N-like (SNP23833), putative disease resistance  
230 protein (SNP23953), LRR receptor-like serine/threonine-protein kinase GSO2 (SNP24483),  
231 and receptor-like protein 12 (SNP24611) (S8 Table).

232

## 233 **Discussion**

### 234 **Phenotypic Variation**

235 Fruit quality parameters are of prime importance for both consumers and growers.  
236 Among these parameters, FT is the most widely studied physical attribute in apricot due to its  
237 economic importance related to early market prices (28) ). In the present study, FT was detected  
238 between 95 and 126 days (Table 1). Among the genotypes studied, Geno115 was the earliest  
239 cultivar with 95 days. In previous studies, FT was reported to range from 59 to 84 days (23)  
240 and 55 to 78 days (28). The variation that was detected in the present study for FT was greater  
241 compared to the literature and can be attributed to the different genetic origins of the cultivars.

242 SSC is one of the main criteria affecting fruit taste, and SSC value greater than 12°Brix  
243 indicates good gustative quality (10). In the present study, SSC was measured between 8.22  
244 and 32.36 °Brix, most genotypes (243 genotypes) had a value over 12°Brix, there was nearly a  
245 fourfold difference in the range (Table 1). In different studies, SSC was detected as 8.73 to  
246 17.80 °Brix (27), 10.6 to 16.2 °Brix (10) and 6.2 to 19.5 °Brix (28). In our study, a larger  
247 variation was found in SSC compared to previous studies. This wide range of phenotypic  
248 discrepancy indicates the genotypic variation level of the apricot genotypes used in the study.

249 FFC and FF are two most important sensorial properties that affect consumer  
250 preferences at the purchase step. In the present study, FFC was measured between 11.6° and  
251 46.77°, and there was nearly a fourfold difference in the range (Table1). In previous studies,  
252 FFC was measured from 67° to 100° (27) and 70° to 94.7° (10). In the current study, the range  
253 of FF was obtained as 0.03 to 9.60 N. In the literature, FF was reported to vary between 24.9  
254 and 62.2 N (10) and 15 and 50 N (27). Both FFC and FF ranges measured in the current study  
255 were quite different from those of previous studies.

256

### 257 **Population Structure**

258 In genetic mapping studies, associations between DNA markers and traits are affected  
259 by the type and number of markers (48). The use of a high number of markers leads to high

260 genome coverage, and therefore high-throughput systems gain importance. In the current study,  
261 DArT, a high-throughput system, was used and a total of 20,264 SNP markers were developed.  
262 These markers were used in population diversity. This high number of markers provided high  
263 genome coverage.

264 The STRUCTURE analysis was used for the identification of the population structure  
265 of the 259 apricots investigated in the current study. These genotypes were divided into three  
266 main populations (S2 Fig). PCA (S3 Fig) and dendrogram (S4 Fig) analyses confirmed the  
267 number of populations. These genotypes were not divided into populations according to their  
268 geographical origin. For example, the genotypes that originated from Turkey, Spain, Italy,  
269 Poland, Armenia, France, USA, and Hungary were included in the same (third) group (S4 Fig).  
270 The reason for this result could be the complex breeding history of these genotypes. In  
271 particular, the use of cultivars with different histories in introgression and intercrossing  
272 processes may have led to this situation (48). In addition, humans move plants from one  
273 geographic realm to another, which results in confusion concerning the origin of the plants (49).  
274 In a previous AM study on apricot, 72 genotypes were used, and the genotypes were divided  
275 into two main groups (37). The reason for the lower number of subpopulations in the current  
276 study could be the use of a population with a narrow genetic basis. Although the previous  
277 authors also selected the genotypes from different countries, they may have used those of the  
278 same origin.

279 In the present study, the mean *Fst* value was detected as 0.55 and the mean expected  
280 heterozygosity was 0.12, indicating the presence of a high genetic variation in the population  
281 structure. These findings also support the idea that DArT systems develop a large number of  
282 SNP markers distributed along the apricot genome. In previous studies, the *Fst* value was  
283 reported to be 0.51 (50) and 0.16 (51), and the expected heterozygosity value was 0.82 (50) and  
284 0.29 (51). These differences between previous studies in terms of diversity may be due to the  
285 number and type of markers utilized, and genotyping being undertaken in distinct locations  
286 (52).

287

### 288 **Association Mapping Analysis**

289 AM is a powerful technique which is based on the accumulation of genetic variability  
290 through evolution in natural populations to identify DNA markers based on the association  
291 between genetic markers and phenotypes (53). AM analyses are used as a rapid and efficient  
292 alternative to linkage mapping analyses (30) for detecting the associations between traits and  
293 markers; therefore, these analyses are widely employed in the mapping of economically

294 important traits in many crop species (54)(55). In the present study, K and Q matrixes were  
295 used to correct the population structure in the MLM (Q+K) model included in AM analyses.  
296 This model effectively eliminates possible false positives with random and fixed effects  
297 according to Henderson's notation (56). In addition, FDR and Bonferroni corrections were  
298 applied to eliminate spurious associations (56). To date, no AM study has been undertaken to  
299 reveal the associations between SNP markers and pomological traits (FF, FFC, FT and SSC).  
300 However, an association map was constructed by MARIETTE et al. (2016) to identify the SNP  
301 markers that controlled resistance to plum pox virus in apricot. Furthermore, Olukolu (2010)  
302 constructed an AM on the chilling requirements of apricot. Apart from these studies, there are  
303 only a limited number of association studies on the economically important traits of the other  
304 members of the *Rosaceae* family (57)(33)(58)(30)(59)(55).

305 In the present study, a total of 131 SNPs were found significantly associated with three  
306 pomological traits (FF, FFC and SSC) of the apricot genotypes via AM analyses (S5-7 Tables  
307 and Fig 1-4). Three SNPs (SNP 4257, SNP17194 and SNP 22875) were found associated with  
308 FFC and 57 SNPs were found associated with FF (S5-7 Tables and Fig1-4). A total of 71 SNPs  
309 were associated with SSC in two consecutive years (2016 and 2017) (S5 and S7 Tables). In  
310 previous studies, (27) and (28) used control cross populations of apricot and found one QTL  
311 each that was related to SSC. The number of significant markers identified in the present study  
312 was higher than previously reported (27)(28) which may be related to the type of population  
313 investigated. In mapping studies, natural populations provide higher genome coverage and  
314 mapping resolution with regard to wide genotypical variations (56). Another reason for our high  
315 number of SNPs may be the use of DArT to produce the markers. This technology is known to  
316 produce a high number of SNP markers, and thus provide high genome coverage.

317

### 318 **Identification of Candidate Genes**

319 In the present study, 30 putative candidate genes showed homology with the sequences  
320 of SNPs associated with FF and SSC (S8 Table). Among these, transcription termination factor  
321 MTERF6 plays an important role in plastid development on *Arabidopsis thaliana* (60). WAT1-  
322 related protein is located on cell wall and responsible for transmembrane transporter activity  
323 (61). Long-chain acyl-CoA synthetase 8 is very important for lipid metabolism (62). UDP-  
324 glycosyltransferase TURAN is one of the responsible enzyme for development of pollen tube.  
325 LRR receptor-like serine/threonine-protein kinase (GSO2) and probable LRR receptor-like  
326 serine/threonine-protein kinase (GSO1) together play a role in root growth and the growth of  
327 epidermal surface in embryos and cotyledons in *Arabidopsis* (63). Putative pentatricopeptide

328 repeat-containing protein is a member of the pentatricopeptide repeat (PPR) protein family and  
329 is involved in the organellar RNA metabolism (64). Calcium-transporting ATPase 12, plasma  
330 membrane-type-like has a function in calcium-transporting ATPase activity and calmodulin  
331 binding (65). tRNA (guanine(37)-N1)-methyltransferase 1 is responsible for the methylation of  
332 cytoplasmic and mitochondrial tRNAs in the N1 position of guanosine-37 *Arabidopsis thaliana*  
333 (66). TMV resistance protein N-like provides resistance to tobacco mosaic virus in plants (67).  
334 Putative 3,4-dihydroxy-2-butanone kinase plays a role in ATP binding (68). Pentatricopeptide  
335 repeat-containing protein is a required protein for the intergenic processing between chloroplast  
336 *rsp7* and *ndhB* transcripts (69).

337

### 338 **Conclusions**

339 This is the first AM study that presents the associations between SNPs based on the  
340 DArT technology and economically important traits (FF, FFC, FT and SSC) in apricot. Large  
341 variations were determined for these four traits. The results of this study highlight the  
342 importance of using populations with wide variations in AM studies. AM revealed significant  
343 associations for FF, FFC and SSC. The SNPs identified in the study can be used in future  
344 breeding programs for marker-assisted selection in apricot. On the other hand, the genotypes  
345 with the shortest FT can be used as parents in developing earlier cultivars combined with other  
346 desirable traits.

347

### 348 **Author Contribution Statement**

349 FF: Association map analysis, writing manuscript; DA: writing manuscript, data obtaining; SE:  
350 PI of the projects; AE: obtained phenotyping data, EO: statistical analysis, data obtaining;  
351 MBT: corresponding author, conceived and designed research.

352

353 **Acknowledgements:** The study was financially supported by the Scientific and Technological  
354 Research Council of Turkey (TUBITAK) with the project number TUBITAK-2150445.

355 **Conflict of interest:** The authors declare no competing interests.

356

357

358

359

360

361

## 362 References

- 363 1. Meneses C, Orellana A. Using genomics to improve fruit quality. Vol. 46, Biological  
364 Research. Sociedad de Biología de Chile; 2013. p. 347–52.
- 365 2. Agric For TJ, Butiuc-keul A, Coste A, Farkas A, Cristea V, Isac V, et al. Turkish  
366 Journal of Agriculture and Forestry Molecular characterization of apple (*Malus ×*  
367 *domestica* Borkh.) genotypes originating from three complementary conservation  
368 strategies. [journals.tubitak.gov.tr](http://journals.tubitak.gov.tr) [Internet]. [cited 2020 Apr 12]; Available from:  
369 <http://journals.tubitak.gov.tr/agriculture/>
- 370 3. Agric For TJ, Soysal D, Demirsoy L, Macit İ, Lang G, Demirsoy H. Turkish Journal of  
371 Agriculture and Forestry The applicability of new training systems for sweet cherry in  
372 Turkey. [journals.tubitak.gov.tr](http://journals.tubitak.gov.tr) [Internet]. [cited 2020 Apr 12]; Available from:  
373 <https://www.mgm.gov.tr/2015>
- 374 4. FAOSTAT [Internet]. [cited 2020 Apr 13]. Available from:  
375 <http://www.fao.org/faostat/en/#data/QC>
- 376 5. Bassi D, Science RS-A in H, 1990 undefined. Evaluation of fruit quality in peach and  
377 apricot. JSTOR [Internet]. [cited 2020 Apr 12]; Available from:  
378 [https://www.jstor.org/stable/42883062?casa\\_token=0H2zwEno-](https://www.jstor.org/stable/42883062?casa_token=0H2zwEno-VYAAAAA:SP5eu8deSgubahtbgu-G-Ob2F9gDIL4cTLojrtZuQeEbMpuibQJPMPbUO99-wh6-ZuPRMsR-ON36WQzmMEMgG-1WZ6rA97CPgZagmDw_4msQhIn-2yo)  
379 [VYAAAAA:SP5eu8deSgubahtbgu-G-](https://www.jstor.org/stable/42883062?casa_token=0H2zwEno-VYAAAAA:SP5eu8deSgubahtbgu-G-Ob2F9gDIL4cTLojrtZuQeEbMpuibQJPMPbUO99-wh6-ZuPRMsR-ON36WQzmMEMgG-1WZ6rA97CPgZagmDw_4msQhIn-2yo)  
380 [Ob2F9gDIL4cTLojrtZuQeEbMpuibQJPMPbUO99-wh6-ZuPRMsR-](https://www.jstor.org/stable/42883062?casa_token=0H2zwEno-VYAAAAA:SP5eu8deSgubahtbgu-G-Ob2F9gDIL4cTLojrtZuQeEbMpuibQJPMPbUO99-wh6-ZuPRMsR-ON36WQzmMEMgG-1WZ6rA97CPgZagmDw_4msQhIn-2yo)  
381 [ON36WQzmMEMgG-1WZ6rA97CPgZagmDw\\_4msQhIn-2yo](https://www.jstor.org/stable/42883062?casa_token=0H2zwEno-VYAAAAA:SP5eu8deSgubahtbgu-G-Ob2F9gDIL4cTLojrtZuQeEbMpuibQJPMPbUO99-wh6-ZuPRMsR-ON36WQzmMEMgG-1WZ6rA97CPgZagmDw_4msQhIn-2yo)
- 382 6. Altindag M, Sahin M, Esitken A, Ercisli S, Control MG-B, 2006 undefined. Biological  
383 control of brown rot (*Moniliana laxa* Ehr.) on apricot (*Prunus armeniaca* L. cv.  
384 Hacıhaliloğlu) by *Bacillus*, *Burkholderia*, and *Pseudomonas* application under. Elsevier  
385 [Internet]. [cited 2020 Apr 12]; Available from:  
386 <https://www.sciencedirect.com/science/article/pii/S1049964406001204>
- 387 7. Halász J, Pedryc A, Ercisli S, ... KY-J of the, 2010 undefined. S-genotyping supports  
388 the genetic relationships between Turkish and Hungarian apricot germplasm.  
389 [journals.ashs.org](http://journals.ashs.org) [Internet]. [cited 2020 Apr 12]; Available from:  
390 <https://journals.ashs.org/jashes/view/journals/jashes/135/5/article-p410.xml>
- 391 8. Abbott JA. Quality measurement of fruits and vegetables [Internet]. Vol. 15,  
392 Postharvest Biology and Technology. 1999 [cited 2020 Apr 12]. Available from:  
393 <https://www.sciencedirect.com/science/article/pii/S0925521498000866>
- 394 9. Defilippi BG, Predieri S, Infante R. Apricot (*Prunus armeniaca* L.) quality and  
395 breeding perspectives SEE PROFILE [Internet]. 2014 [cited 2020 Apr 12]. Available  
396 from: [www.world-food.net](http://www.world-food.net)
- 397 10. Soriano JM, Vera-Ruiz EM, Vilanova S, Martínez-Calvo J, Llácer G, Badenes ML, et  
398 al. Identification and mapping of a locus conferring plum pox virus resistance in two  
399 apricot-improved linkage maps. *Tree Genet Genomes*. 2008 Jul;4(3):391–402.
- 400 11. Akin E, Karabulut I, Chemistry AT-F, 2008 undefined. Some compositional properties  
401 of main Malatya apricot (*Prunus armeniaca* L.) varieties. Elsevier [Internet]. [cited  
402 2020 Apr 12]; Available from:  
403 <https://www.sciencedirect.com/science/article/pii/S0308814607008473>
- 404 12. Dragovic-Uzelac V, Levaj B, Mrkic V, chemistry DB-F, 2007 undefined. The content  
405 of polyphenols and carotenoids in three apricot cultivars depending on stage of  
406 maturity and geographical region. Elsevier [Internet]. [cited 2020 Apr 12]; Available  
407 from: <https://www.sciencedirect.com/science/article/pii/S0308814606002962>
- 408 13. Drogoudi PD, Vemmos S, Pantelidis G, Petri E, Tzoutzoukou C, Karayiannis I.  
409 Physical Characters and Antioxidant, Sugar, and Mineral Nutrient Contents in Fruit  
410 from 29 Apricot (*Prunus armeniaca* L.) Cultivars and Hybrids. *J Agric Food Chem*  
411 [Internet]. 2008 Nov 26 [cited 2020 Apr 12];56(22):10754–60. Available from:

- 412 <http://pubs.acs.org>
- 413 14. Leccese A, Bureau S, Reich M, Renard MGCC, Audergon JM, Mennone C, et al.  
414 Pomological and nutraceutical properties in apricot fruit: Cultivation systems and cold  
415 storage fruit management. *Plant Foods Hum Nutr.* 2010;65(2):112–20.
- 416 15. Hegedus A, Engel R, Abrankó L, Balogh E, Blázovics A, Hermán R, et al. Antioxidant  
417 and Antiradical Capacities in Apricot (*Prunus armeniaca* L.) Fruits: Variations from  
418 Genotypes, Years, and Analytical Methods. *J Food Sci.* 2010 Nov;75(9).
- 419 16. Madrau MA, Piscopo A, Sanguinetti AM, Del Caro A, Poiana M, Romeo F V., et al.  
420 Effect of drying temperature on polyphenolic content and antioxidant activity of  
421 apricots. *Eur Food Res Technol.* 2009 Jan;228(3):441–8.
- 422 17. Fan S, Bielenberg DG, Zhebentyayeva TN, Reighard GL, Okie WR, Holland D, et al.  
423 Mapping quantitative trait loci associated with chilling requirement, heat requirement  
424 and bloom date in peach (*Prunus persica*). *New Phytol* [Internet]. 2010 Mar 1 [cited  
425 2020 Apr 12];185(4):917–30. Available from: [http://doi.wiley.com/10.1111/j.1469-](http://doi.wiley.com/10.1111/j.1469-8137.2009.03119.x)  
426 [8137.2009.03119.x](http://doi.wiley.com/10.1111/j.1469-8137.2009.03119.x)
- 427 18. Illa E, Eduardo I, Audergon JM, Barale F, Dirlwanger E, Li X, et al. Saturating the  
428 *Prunus* (stone fruits) genome with candidate genes for fruit quality. *Mol Breed.* 2011  
429 Dec;28(4):667–82.
- 430 19. Neale DB, Savolainen O. Association genetics of complex traits in conifers. Elsevier  
431 [Internet]. [cited 2020 Apr 12]; Available from: [www.sciencedirect.com](http://www.sciencedirect.com)
- 432 20. Würschum T. Mapping QTL for agronomic traits in breeding populations. Vol. 125,  
433 *Theoretical and Applied Genetics.* 2012. p. 201–10.
- 434 21. Shulaev V, Korban SS, Sosinski B, Abbott AG, Aldwinckle HS, Folta KM, et al.  
435 Multiple models for Rosaceae genomics. Vol. 147, *Plant Physiology.* American Society  
436 of Plant Biologists; 2008. p. 985–1003.
- 437 22. Campoy JA, Ruiz D, Egea J, Rees DJG, Celton JM, Martínez-Gómez P. Inheritance of  
438 Flowering Time in Apricot (*Prunus armeniaca* L.) and Analysis of Linked Quantitative  
439 Trait Loci (QTLs) using Simple Sequence Repeat (SSR) Markers. *Plant Mol Biol*  
440 *Report.* 2011 Jun;29(2):404–10.
- 441 23. Dirlwanger E, Quero-Garcia J, Heredity LLD-, 2012 undefined. Comparison of the  
442 genetic determinism of two key phenological traits, flowering and maturity dates, in  
443 three *Prunus* species: peach, apricot and sweet cherry. *nature.com* [Internet]. [cited  
444 2020 Apr 12]; Available from: <https://www.nature.com/articles/hdy201238>
- 445 24. Lambert P, Dicenta F, Rubio M, Audergon JM. QTL analysis of resistance to sharka  
446 disease in the apricot (*Prunus armeniaca* L.) “Polonais” x “Stark Early Orange” F1  
447 progeny. *Tree Genet Genomes.* 2007 Oct;3(4):299–309.
- 448 25. Marandel G, Salava J, Abbott A, Candresse T, Decroocq V. Quantitative trait loci  
449 meta-analysis of Plum pox virus resistance in apricot (*Prunus armeniaca* L.): New  
450 insights on the organization and the identification of genomic resistance factors. *Mol*  
451 *Plant Pathol.* 2009 May;10(3):347–60.
- 452 26. Dondini L, Lain O, Vendramin V, Rizzo M, Vivoli D, Adami M, et al. Identification of  
453 QTL for resistance to plum pox virus strains M and D in Lito and Harcot apricot  
454 cultivars. *Mol Breed.* 2011 Jan;27(3):289–99.
- 455 27. Salazar JA, Ruiz D, Egea J, Martínez-Gómez P. Transmission of Fruit Quality Traits in  
456 Apricot (*Prunus armeniaca* L.) and Analysis of Linked Quantitative Trait Loci (QTLs)  
457 Using Simple Sequence Repeat (SSR) Markers. *Plant Mol Biol Report.* 2013  
458 Dec;31(6):1506–17.
- 459 28. Socquet-Juglard D, Christen D, Devènes G, Gessler C, Duffy B, Patocchi A. Mapping  
460 Architectural, Phenological, and Fruit Quality QTLs in Apricot. *Plant Mol Biol Report.*  
461 2013;31(2):387–97.

- 462 29. Olukolu BA, Trainin T, Fan S, Kole C, Bielenberg DG, Reighard GL, et al. Genetic  
463 linkage mapping for molecular dissection of chilling requirement and budbreak in  
464 apricot (*Prunus armeniaca* L.). Gulick P, editor. Genome [Internet]. 2009 Oct [cited  
465 2020 Apr 12];52(10):819–28. Available from:  
466 <http://www.nrcresearchpress.com/doi/10.1139/G09-050>
- 467 30. Font i Forcada C, Velasco L, Socias i Company R, Fernández i Martí Á. Association  
468 mapping for kernel phytosterol content in almond. Front Plant Sci. 2015 Jul  
469 9;6(JULY).
- 470 31. Kaya HB, Cetin O, Kaya HS, Sahin M, Sefer F, Tanyolac B. Association Mapping in  
471 Turkish Olive Cultivars Revealed Significant Markers Related to Some Important  
472 Agronomic Traits. Biochem Genet. 2016 Aug 1;54(4):506–33.
- 473 32. Aranzana MJ, Abbassi EK, Howad W, Arús P. Genetic variation, population structure  
474 and linkage disequilibrium in peach commercial varieties. BMC Genet. 2010 Jul 20;11.
- 475 33. Cao K, Wang L, Zhu G, Fang W, Chen C, Luo J. Genetic diversity, linkage  
476 disequilibrium, and association mapping analyses of peach (*Prunus persica*) landraces  
477 in China. Tree Genet Genomes. 2012;8(5):975–90.
- 478 34. Font i Forcada C, Oraguzie N, Igartua E, Moreno MÁ, Gogorcena Y. Population  
479 structure and marker-trait associations for pomological traits in peach and nectarine  
480 cultivars. Tree Genet Genomes. 2013;9(2):331–49.
- 481 35. Picañol R, Eduardo I, Aranzana MJ, Howad W, Batlle I, Iglesias I, et al. Combining  
482 linkage and association mapping to search for markers linked to the flat fruit character  
483 in peach. Euphytica. 2013;190(2):279–88.
- 484 36. Cevik V, Ryder CD, Popovich A, Manning K, King GJ, Seymour GB. A FRUITFULL-  
485 like gene is associated with genetic variation for fruit flesh firmness in apple (*Malus*  
486 *domestica* Borkh.). Tree Genet Genomes. 2010 Jan;6(2):271–9.
- 487 37. Mariette S, Wong Jun Tai F, Roch G, Barre A, Chague A, Decroocq S, et al. Genome-  
488 wide association links candidate genes to resistance to Plum Pox Virus in apricot  
489 (*Prunus armeniaca*). New Phytol. 2016 Jan 1;209(2):773–84.
- 490 38. Deshmukh V, Thakare P, ... UC-EJ of, 2007 undefined. A simple method for isolation  
491 of genomic DNA from fresh and dry leaves of *Terminalia arjuna* (Roxb.) Wight and  
492 Arnot. scielo.conicyt.cl [Internet]. [cited 2020 Apr 12]; Available from:  
493 [https://scielo.conicyt.cl/scielo.php?pid=S0717-](https://scielo.conicyt.cl/scielo.php?pid=S0717-34582007000300014&script=sci_arttext&tlng=n)  
494 [34582007000300014&script=sci\\_arttext&tlng=n](https://scielo.conicyt.cl/scielo.php?pid=S0717-34582007000300014&script=sci_arttext&tlng=n)
- 495 39. Acikgoz N, Ilker E, University AG-E, TOTEM undefined, Izmir undefined, 2004  
496 undefined. Assessment of biological research on the computer.
- 497 40. Agric For TJ, Nemli S, Kaygisiz Aşçıoğul T, Ateş D, Eşiyok D, Bahattin TANYOLAÇ  
498 M. Turkish Journal of Agriculture and Forestry Diversity and genetic analysis through  
499 DArTseq in common bean (*Phaseolus vulgaris* L.) germplasm from Turkey. [cited  
500 2020 Apr 13]; Available from: <http://journals.tubitak.gov.tr/agriculture/>
- 501 41. Lynch M, Ritland K. Estimation of Pairwise Relatedness With Molecular Markers  
502 [Internet]. Genetics Soc America. 1999 [cited 2020 Apr 13]. Available from:  
503 <https://www.genetics.org/content/152/4/1753.short>
- 504 42. Pritchard J, Stephens M, Genetics PD-, 2000 undefined. Inference of population  
505 structure using multilocus genotype data. Genet Soc Am [Internet]. [cited 2020 Apr  
506 12]; Available from: <https://www.genetics.org/content/155/2/945.full-text.pdf+html>
- 507 43. Evanno G, Regnaut S, Goudet J. Detecting the number of clusters of individuals using  
508 the software STRUCTURE: A simulation study. Mol Ecol. 2005 Jul;14(8):2611–20.
- 509 44. Nei M. Genetic Distance between Populations. Am Nat. 1972 May;106(949):283–92.
- 510 45. Bradbury P, Zhang Z, Kroon D, ... TC-, 2007 undefined. TASSEL: software for  
511 association mapping of complex traits in diverse samples. academic.oup.com [Internet].

- 512 [cited 2020 Apr 13]; Available from: <https://academic.oup.com/bioinformatics/article-abstract/23/19/2633/185151>
- 513
- 514 46. Benjamini Y, Hochberg Y. Controlling the False Discovery Rate: A Practical and  
515 Powerful Approach to Multiple Testing. *J R Stat Soc Ser B*. 1995 Jan;57(1):289–300.
- 516 47. carboni CB-S in onore del professore salvatore ortu, 1935 undefined. Il calcolo delle  
517 assicurazioni su gruppi di teste. *ci.nii.ac.jp* [Internet]. [cited 2020 Apr 12]; Available  
518 from: <https://ci.nii.ac.jp/naid/20001029336/>
- 519 48. Mather D, Hayes P, Chalmers K, Eglinton J, Matus I, Richardson K, et al. Use of SSR  
520 Marker Data to Study Linkage Disequilibrium and Population Structure in *Hordeum*  
521 *vulgare*: Prospects for Association Mapping in Barley. *Czech Journal of Genetics and*  
522 *Plant Breeding*; 2004.
- 523 49. Pyšek P, Richardson DM, Rejmánek M, Webster GL, Williamson M, Kirschner J.  
524 Alien plants in checklists and floras: towards better communication between  
525 taxonomists and ecologists. *Taxon* [Internet]. 2004 Feb [cited 2019 Dec 24];53(1):131–  
526 43. Available from: <http://doi.wiley.com/10.2307/4135498>
- 527 50. Khan M, Maghuly F, ... EB-F-S, 2008 undefined. Genetic diversity and population  
528 structure of apricot (*Prunus armeniaca* L.) from Northern Pakistan using Simple  
529 Sequence Repeats. *degruyter.com* [Internet]. [cited 2020 Apr 13]; Available from:  
530 [https://www.degruyter.com/downloadpdf/j/sg.2008.57.issue-1-6/sg-2008-0024/sg-](https://www.degruyter.com/downloadpdf/j/sg.2008.57.issue-1-6/sg-2008-0024/sg-2008-0024.xml)  
531 [2008-0024.xml](https://www.degruyter.com/downloadpdf/j/sg.2008.57.issue-1-6/sg-2008-0024/sg-2008-0024.xml)
- 532 51. Tian-Ming H, Xue-Sen C, Zheng X, Jiang-Sheng G, Pei-Jun L, Wen L, et al. Using  
533 SSR markers to determine the population genetic structure of wild apricot (*Prunus*  
534 *armeniaca* L.) in the Ily Valley of West China. *Genet Resour Crop Evol*. 2007 May  
535 26;54(3):563–72.
- 536 52. Ates D, Ascioğul TK, Nemli S, Erdogmus S, Esiyok D, Tanyolac MB. Association  
537 mapping of days to flowering in common bean (*Phaseolus vulgaris* L.) revealed by  
538 DArT markers. *Mol Breed*. 2018 Sep 1;38(9):1–14.
- 539 53. Ozkuru E, Ates D, Nemli S, Erdogmus S, Karaca N, Yilmaz H, et al. Genome-wide  
540 association studies of molybdenum and selenium concentrations in *C. arietinum* and *C.*  
541 *reticulatum* seeds. *Mol Breed*. 2019 Mar 1;39(3).
- 542 54. Khazaei H, Podder R, Caron C, ... SK-T plant, 2017 undefined. Marker–trait  
543 association analysis of iron and zinc concentration in lentil (*Lens culinaris* Medik.)  
544 seeds. *dl.sciencesocieties.org* [Internet]. [cited 2020 Apr 12]; Available from:  
545 [https://dl.sciencesocieties.org/publications/tpg/abstracts/10/2/plantgenome2017.02.000](https://dl.sciencesocieties.org/publications/tpg/abstracts/10/2/plantgenome2017.02.0007)  
546 [7](https://dl.sciencesocieties.org/publications/tpg/abstracts/10/2/plantgenome2017.02.0007)
- 547 55. Font I, Forcada C, Guajardo V, Chin-Wo SR, Moreno MÁ. Association mapping  
548 analysis for fruit quality traits in *Prunus persica* using SNP markers. *Front Plant Sci*.  
549 2019 Jan 17;9.
- 550 56. Cappa EP, El-Kassaby YA, Garcia MN, Acuña C, Borralho NMG, Grattapaglia D, et  
551 al. Impacts of population structure and analytical models in genome-wide association  
552 studies of complex traits in forest trees: A case study in *Eucalyptus globulus*. *PLoS*  
553 *One*. 2013 Nov 25;8(11).
- 554 57. Ganopoulos I V., Kazantzis K, Chatzicharisis I, Karayiannis I, Tsiftaris AS. Genetic  
555 diversity, structure and fruit trait associations in Greek sweet cherry cultivars using  
556 microsatellite based (SSR/ISSR) and morpho-physiological markers. *Euphytica*. 2011  
557 Sep;181(2):237–51.
- 558 58. Dhanapal AP, Crisosto CH. Association genetics of chilling injury susceptibility in  
559 peach (*Prunus persica* (L.) Batsch) across multiple years. *3 Biotech*. 2013  
560 Dec;3(6):481–90.
- 561 59. Cao K, Zhou Z, Wang Q, Guo J, Zhao P, ... GZ-N, et al. Genome-wide association



- 562 study of 12 agronomic traits in peach. *nature.com* [Internet]. [cited 2020 Apr 12];  
563 Available from: <https://www.nature.com/articles/ncomms13246>
- 564 60. Romani I, Manavski N, Morosetti A, Tadini L, Maier S, Kühn K, et al. A Member of  
565 the Arabidopsis Mitochondrial Transcription Termination Factor Family Is Required  
566 for Maturation of Chloroplast Transfer RNA Ile (GAU). *Am Soc Plant Biol* [Internet].  
567 2010 [cited 2020 Apr 12]; Available from:  
568 [www.plantphysiol.org/cgi/doi/10.1104/pp.15.00964](http://www.plantphysiol.org/cgi/doi/10.1104/pp.15.00964)
- 569 61. Kovi M, Amdahl H, Alsheikh M, reports OR-S, 2017 undefined. De novo and  
570 reference transcriptome assembly of transcripts expressed during flowering provide  
571 insight into seed setting in tetraploid red clover. *nature.com* [Internet]. [cited 2020 Apr  
572 12]; Available from: <https://www.nature.com/articles/srep44383>
- 573 62. Zhao L, Haslam T, Sonntag A, ... IM-P and C, 2019 undefined. Functional Overlap of  
574 Long-Chain Acyl-CoA Synthetases in Arabidopsis. *academic.oup.com* [Internet]. [cited  
575 2020 Apr 12]; Available from: [https://academic.oup.com/pcp/article-  
576 abstract/60/5/1041/5304662](https://academic.oup.com/pcp/article-abstract/60/5/1041/5304662)
- 577 63. Racolta A, Bryan AC, Tax FE. The receptor-like kinases GSO1 and GSO2 together  
578 regulate root growth in arabidopsis through control of cell division and cell fate  
579 specification. *Dev Dyn*. 2014 Feb;243(2):257–78.
- 580 64. Williams PM, Barkan A. A chloroplast-localized PPR protein required for plastid  
581 ribosome accumulation. *Plant J*. 2003 Dec;36(5):675–86.
- 582 65. Song P, Chen X, Wu B, Gao L, Zhi H, Cui X. Identification for soybean host factors  
583 interacting with P3N-PIPO protein of Soybean mosaic virus. *Acta Physiol Plant*. 2016  
584 Jun 1;38(6).
- 585 66. Lee C, Kramer G, Graham DE, Appling DR. Yeast mitochondrial initiator tRNA is  
586 methylated at guanosine 37 by the Trm5-encoded tRNA (guanine-N1-)-  
587 methyltransferase. *J Biol Chem*. 2007 Sep 21;282(38):27744–53.
- 588 67. Hehl R, Faurie E, Whitham S, Baker B, Hesselbach J, Salamini F, et al. TMV  
589 resistance gene N homologues are linked to *Synchytrium endobioticum* resistance in  
590 potato. *Theor Appl Genet*. 1999;98(3–4):379–86.
- 591 68. Herz S, Kis K, Bacher A, Phytochemistry FR-, 2002 undefined. A tomato enzyme  
592 catalyzing the phosphorylation of 3, 4-dihydroxy-2-butanone. Elsevier [Internet]. [cited  
593 2020 Apr 12]; Available from:  
594 <https://www.sciencedirect.com/science/article/pii/S0031942202000560>
- 595 69. Barkan A, Small I. Pentatricopeptide Repeat Proteins in Plants. *Annu Rev Plant Biol*.  
596 2014 Apr 29;65(1):415–42.  
597  
598

599

600 **Figure Legends**

601

602 **Fig 1** Manhattan plots of fruit firmness for the two years

603 **Fig 2** Manhattan plots of fruit flesh color for the two years

604 **Fig 3** Manhattan plots of flowering time for the two years

605 **Fig 4** Manhattan plots of solid soluble content for the two years

606

607 **Supporting Information**

608

609 **S1 Fig** Histogram showing the distribution of fruit firmness in 2016 and 2017

610 **S2 Fig** Histogram showing the distribution of fruit flesh color in 2016 and 2017

611 **S3 Fig** Histogram showing the distribution of flowering time in 2016 and 2017

612 **S4 Fig** Histogram showing the distribution of solid soluble content in 2016 and 2017

613 **S5 Fig** STRUCTURE plot of 259 individuals by 20,264 SNPs at  $\Delta K = 3$

614 **S6 Fig** PCA analysis of 259 individuals

615 **S7 Fig** Dendrogram tree analysis based on Nei's genetic distance

616 **S8 Fig** Q-Q plots of fruit firmness, fruit flesh color, flowering time, and solid soluble content

617 **S1 Table** List of 259 apricot genotypes

618 **S2 Table** Individuals with the highest and lowest average values of investigated traits

619 **S3 Table** Correlation analysis results

620 **S4 Table** Summary of ANOVA for fruit firmness, fruit flesh color, flowering time, and solid  
621 soluble content

622

623 **S5 Table** Number of SNP markers associated with the investigated traits according to the FDR  
624 correction threshold

625 **S6 Table** List of SNP markers identified as significantly associated with fruit firmness

626 **S7 Table** List of SNP markers identified as significantly associated with SSC

627 **S8 Table** Details of identification of putative candidate gene associations

628

629

**a)****Fruit Firmness - 2016**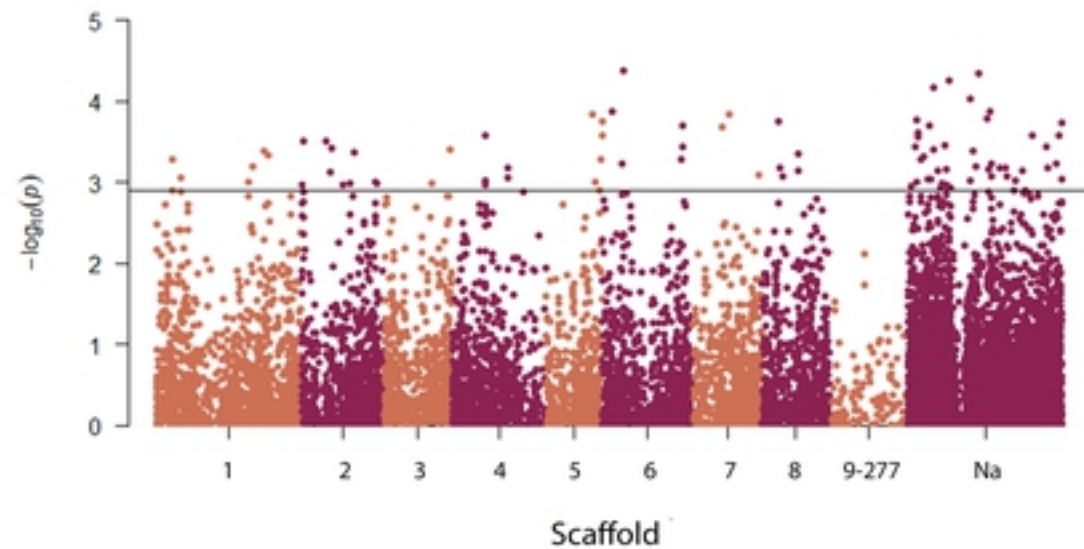**b)****Fruit Firmness - 2017**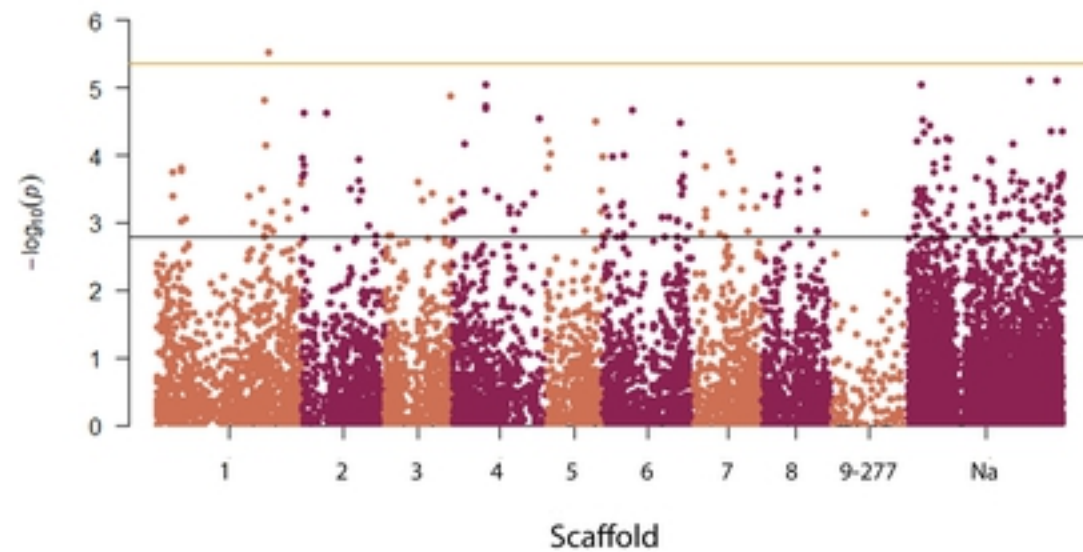**Figure 1**

**a)****Fruit Flesh Color - 2016**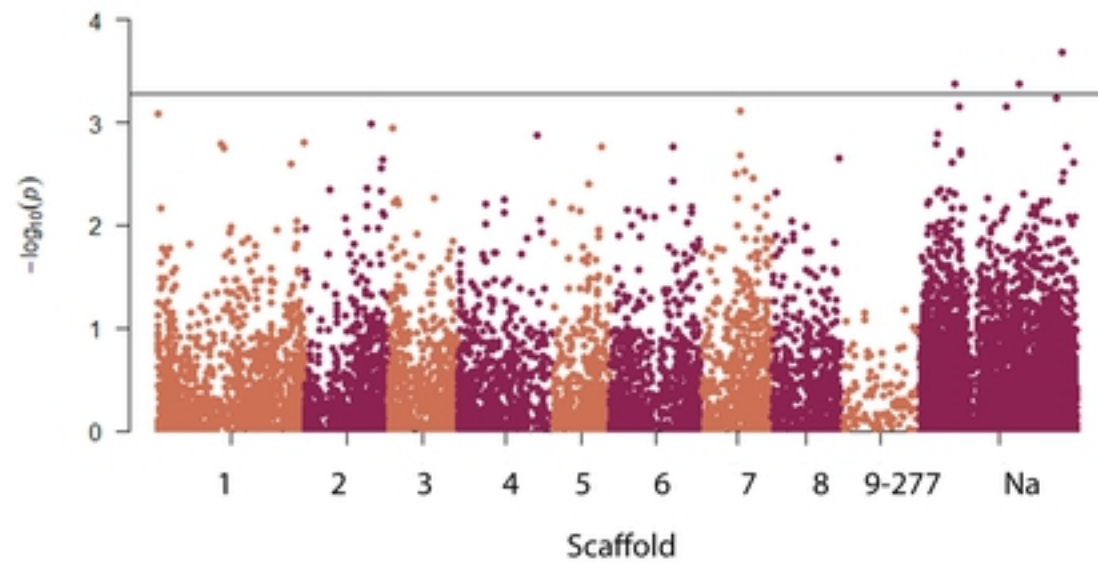**b)****Fruit Flesh Color - 2017**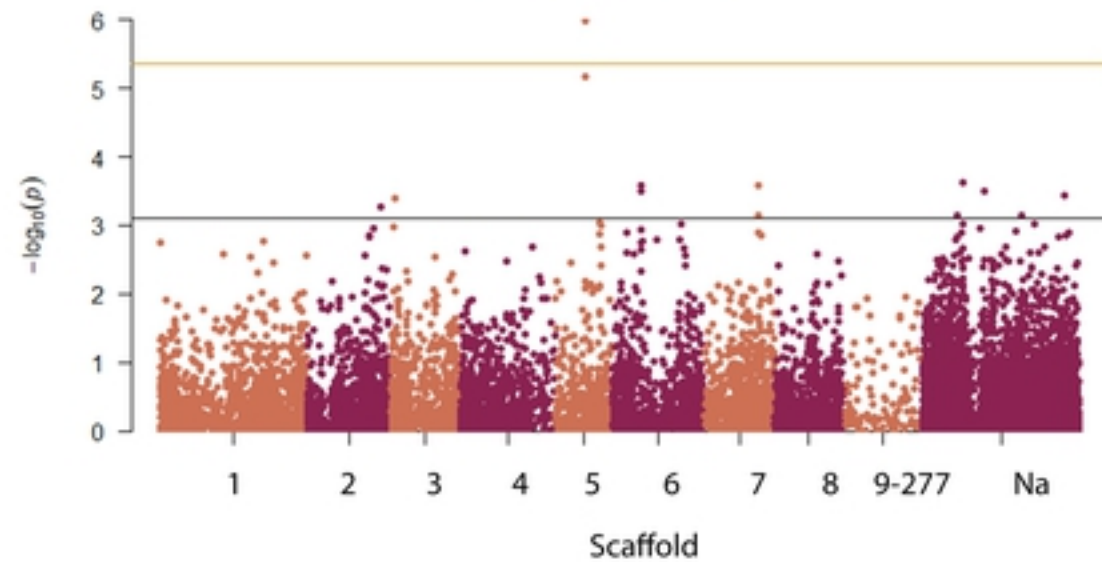**Figure 2**

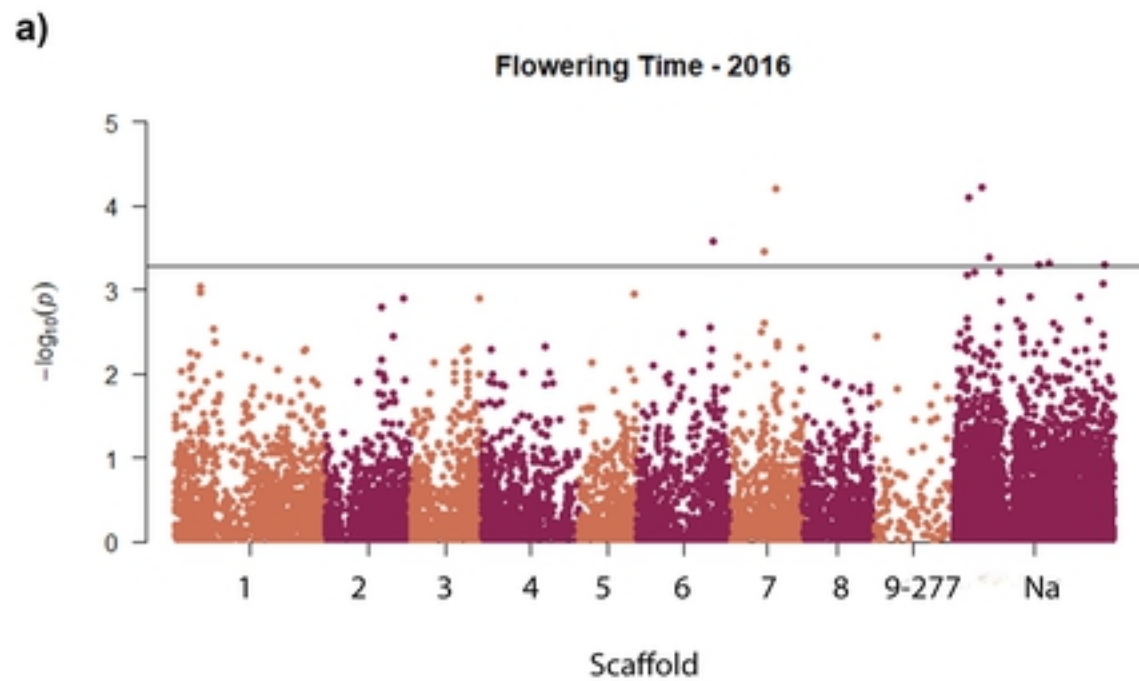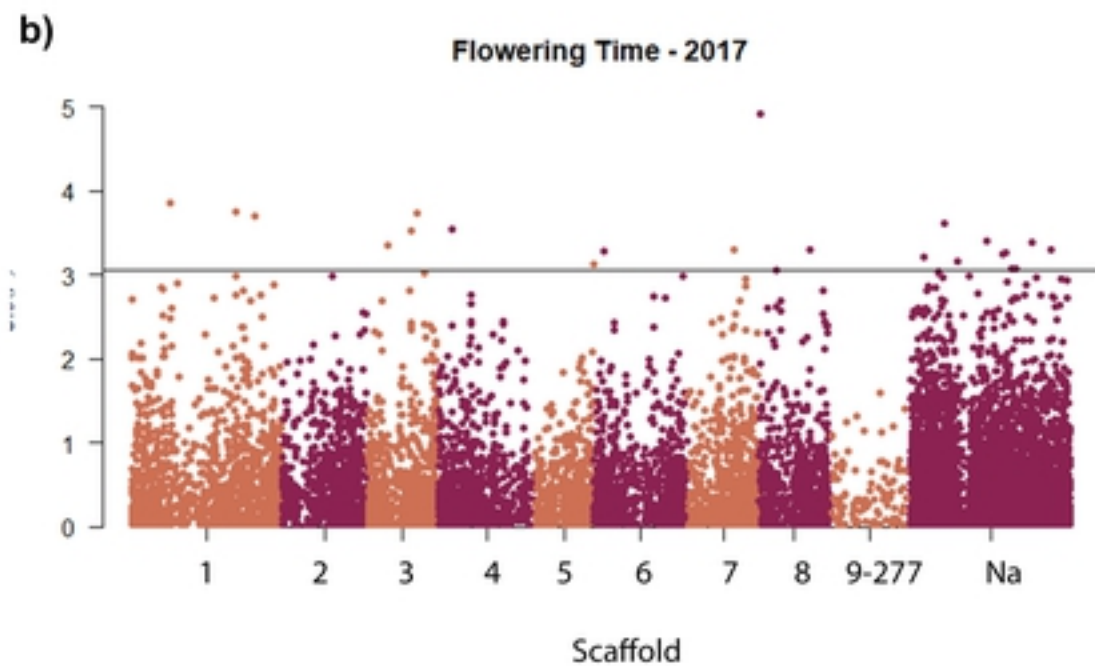

Figure 3

**a)**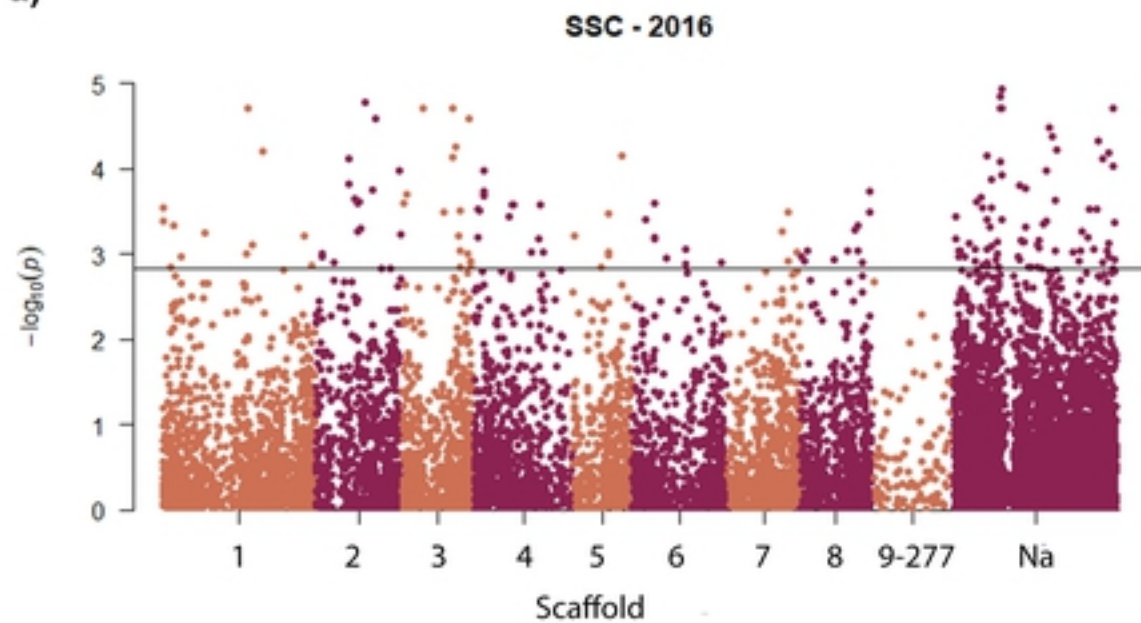**b)**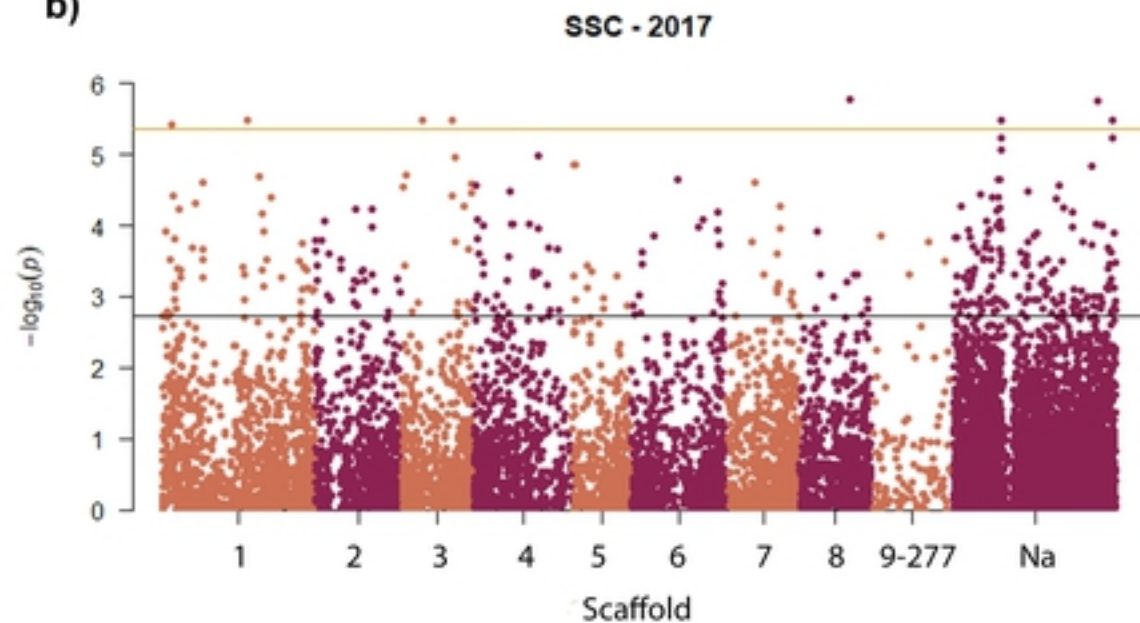**Figure 4**
